# Supplementary material for: Transient Biocompatible Polymeric Platforms for Long-Term Controlled Release of Therapeutic Proteins and Vaccines
Source: MDPI journal article supplement (doi:10.3390/ma9050321), 2016-04-28
Supplement: s1 [file s1]

# Supplementary Materials: Advanced Gelatin-Based Polymer Platform for Long-Term Release of Therapeutic Proteins or Vaccines

Handan Acar, Saikat Banerjee, Heliang Shi, Reihaneh Jamshidi, Nastaran Hashemi, Michael W. Cho and Reza Montazami

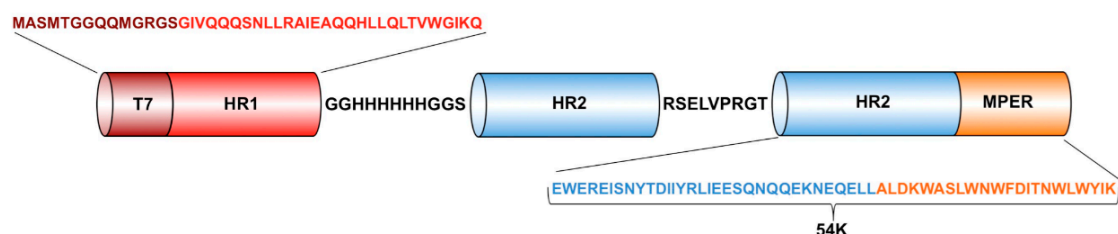

**Figure S1.** Domain structure and sequence of gp41-HR1-HR2-54K. The protein contains a T7 expression tag, HR1 domain, 6xHis linker, HR2 domain, thrombin cleavage linker, HR2 domain, and MPER domain.

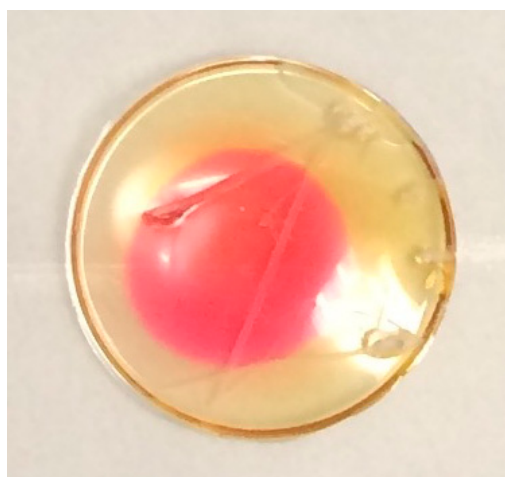

**Figure S2.** Photograph of an IPNF, rhodamine-labeled protein (pink core) is encapsulated in a gelatin-based pellet.

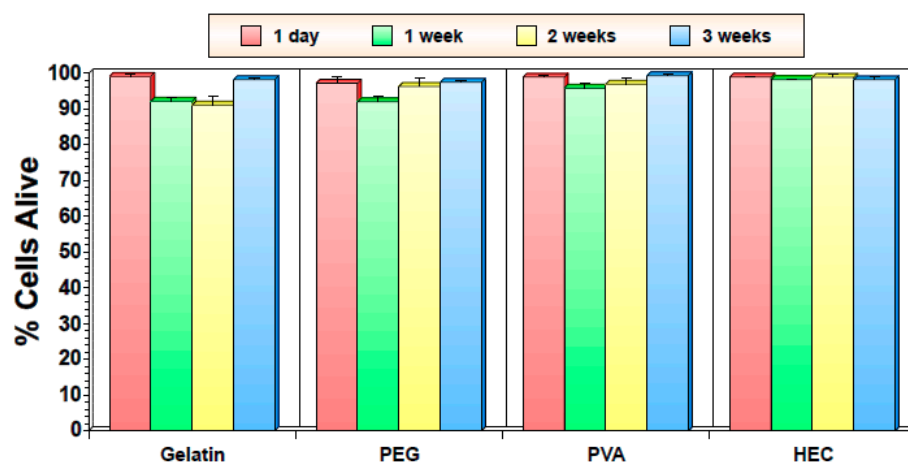

**Figure S3.** Cytotoxicity of IPNFs. The different IPNFs showed little to no cytotoxicity *in vitro*, even after three weeks of incubation.
